# Supplementary material
Source: Elsevier journal article supplement (https://www.sciencedirect.com/science/article/pii/S0001651919300500)

**Fig Supl. 1.** Árbol de clasificación obtenido con el análisis de partición recursiva en la cohorte de pacientes utilizada en el desarrollo del modelo considerando la supervivencia específica como variable dependiente.

**
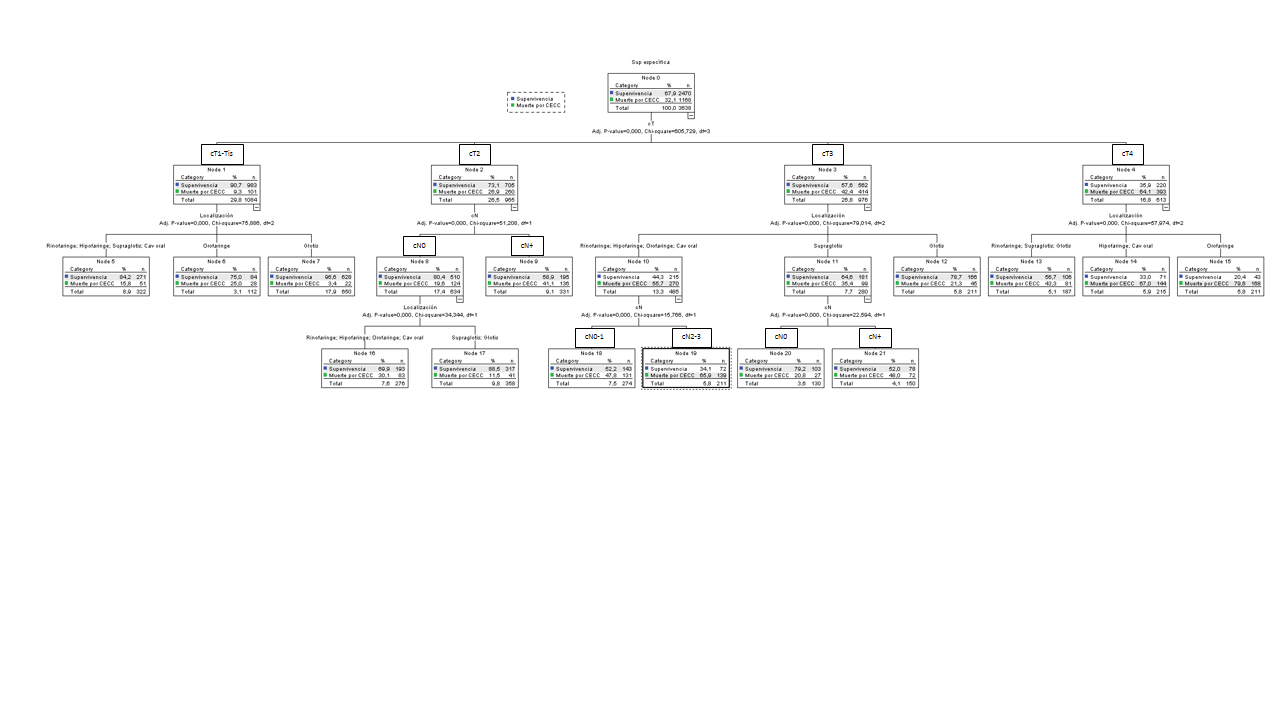
**

**Fig Supl. 2.** Árbol de clasificación obtenido con el análisis de partición recursiva en la cohorte de pacientes utilizada en el desarrollo del modelo considerando el control local de la enfermedad como variable dependiente.


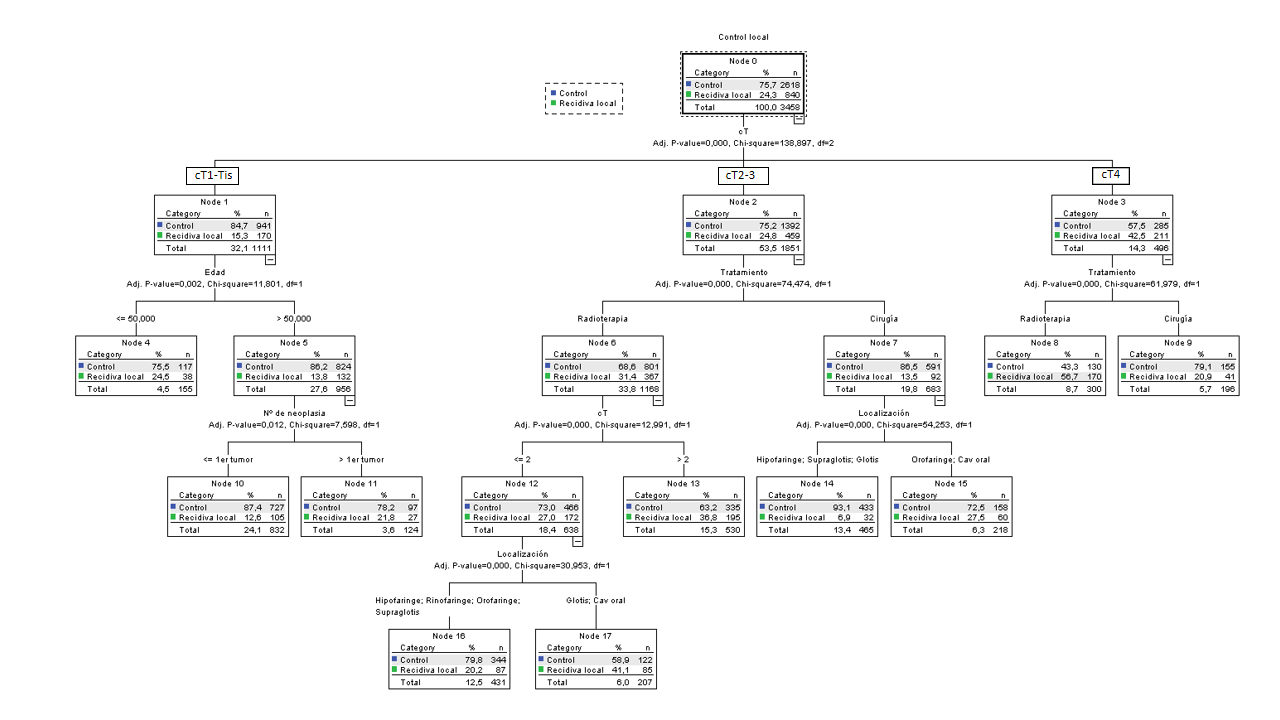

Supplement: mmc1 [file S0001651919300500:mmc1.docx]
